# Supplementary material for: Effective Connectivity Evaluation of Resting-State Brain Networks in Alzheimer’s Disease, Amnestic Mild Cognitive Impairment, and Normal Aging: An Exploratory Study
Source: MDPI journal article supplement (doi:10.3390/brainsci13020265), 2023-02-04
Supplement: s1 [file s1]

**Table S1.** The MNI coordinates associated with the 32 regions of interest from 8 resting-state network

| Resting-state network    | Region                                 | Region (abbreviation)   | Coordination |
|--------------------------|----------------------------------------|-------------------------|--------------|
| Default mode network     | Medial prefrontal cortex               | MPFC                    | 1 55 -3      |
| Default mode network     | Left lateral parietal                  | LP(L)                   | -39 -77 33   |
| Default mode network     | Right lateral parietal                 | LP(R)                   | 47 -67 29    |
| Default mode network     | Posterior cingulate cortex             | PCC                     | 1 -61 38     |
| Sensorimotor network     | Left lateral sensorimotor              | Sensorimotor lateral(L) | -55 -12 29   |
| Sensorimotor network     | Right lateral sensorimotor             | Sensorimotor lateral(R) | 56 -10 29    |
| Sensorimotor network     | Superior sensorimotor                  | Sensorimotor superior   | 0 -31 67     |
| Visual network           | Medial visual                          | Visual medial           | 2 -79 12     |
| Visual network           | Occipital visual                       | Visual occipital        | 0 -93 -4     |
| Visual network           | Left lateral visual                    | Visual lateral(L)       | -37 -79 10   |
| Visual network           | Right lateral visual                   | Visual lateral(R)       | 38 -72 13    |
| Salience network         | Anterior cingulate cortex              | ACC                     | 0 22 35      |
| Salience network         | Left anterior insula                   | AInsula(L)              | -44 13 1     |
| Salience network         | Right anterior insula                  | AInsula(R)              | 47 14 0      |
| Salience network         | Left rostral prefrontal cortex         | RPFC(L)                 | -32 45 27    |
| Salience network         | Right rostral prefrontal cortex        | RPFC(R)                 | 32 46 27     |
| Salience network         | Left supramarginal gyrus               | SMG(L)                  | -60 -39 31   |
| Salience network         | Right supramarginal gyrus              | SMG(R)                  | 62 -35 32    |
| Dorsal attention network | Left frontal eye field                 | FEF(L)                  | -27 -9 64    |
| Dorsal attention network | Right frontal eye field                | FEF(R)                  | 30 -6 64     |
| Dorsal attention network | Left intraparietal sulcus              | IPS(L)                  | -39 43 52    |
| Dorsal attention network | Right intraparietal sulcus             | IPS(R)                  | 39 -42 54    |
| Frontopariatal network   | Left lateral prefrontal cortex         | LPFC(L)                 | -43 33 28    |
| Frontopariatal network   | Left posterior parietal cortex         | PPC(L)                  | -46 -58 49   |
| Frontopariatal network   | Right lateral prefrontal cortex        | LPFC(R)                 | 41 38 30     |
| Frontopariatal network   | Right posterior parietal cortex        | PPC(R)                  | 52 -52 45    |
| Language network         | Left inferior frontal gyrus            | IFG(L)                  | -51 26 2     |
| Language network         | Right inferior frontal gyrus           | IFG(R)                  | 54 28 1      |
| Language network         | Left posterior superior temporal gyrus | pSTG(L)                 | -57 -47 15   |

|                    |                                         |         |           |
|--------------------|-----------------------------------------|---------|-----------|
| Language network   | Right posterior superior temporal gyrus | pSTG(R) | 59 -42 13 |
| Cerebellar network | Anterior cerebellar                     | CA      | 0 -63 -30 |
| Cerebellar network | Posterior cerebellar                    | CP      | 0 -79 -32 |

**Table S2.** Mean/ standard deviation (STD) of connection strengths in the default mode network. The rows of the table show source regions, and columns represent target regions. Connections with power > 0.05 Hertz (Hz) are shown in bold. The Mean/STD of connection strengths in the resting-state network are presented in Hz.

| Default mode network Late-onset AD |                     |                      |                      |                      |
|------------------------------------|---------------------|----------------------|----------------------|----------------------|
| Mean/STD                           | MPFC                | LP(L)                | LP(R)                | PCC                  |
| MPFC                               | -0.1948±0.5031      | -0.049±0.4421        | <b>0.0597±0.3906</b> | <b>0.0702±0.3805</b> |
| LP(L)                              | -0.1917±0.4564      | 0.241±0.3139         | 0.0376±0.2672        | 0.0479±0.3619        |
| LP(R)                              | -0.2838±0.5346      | 0.0096±0.3236        | 0.1762±0.2936        | <b>0.1237±0.327</b>  |
| PCC                                | -0.1744±0.4374      | -0.1018±0.408        | <b>0.1993±0.4116</b> | 0.152±0.3759         |
| Default mode network aMCI          |                     |                      |                      |                      |
| Mean/STD                           | MPFC                | LP(L)                | LP(R)                | PCC                  |
| MPFC                               | -0.0939±0.2138      | -0.0971±0.5526       | <b>0.0744±0.5253</b> | -0.2802±0.5441       |
| LP(L)                              | -0.1103±0.2917      | 0.1456±0.5393        | <b>0.0714±0.4277</b> | <b>0.0933±0.43</b>   |
| LP(R)                              | -0.1244±0.4472      | -0.2282±0.5024       | 0.1601±0.4274        | <b>0.1493±0.3947</b> |
| PCC                                | <b>0.1298±0.288</b> | -0.2154±0.4811       | -0.0417±0.5369       | -0.2016±0.5045       |
| Default mode network normal        |                     |                      |                      |                      |
| Mean/STD                           | MPFC                | LP(L)                | LP(R)                | PCC                  |
| MPFC                               | -0.1123±0.3571      | -0.3602±0.6139       | -0.2347±0.5749       | 0.0303±0.3984        |
| LP(L)                              | <b>0.173±0.3913</b> | -0.0803±0.4216       | <b>0.1519±0.3891</b> | -0.0314±0.3136       |
| LP(R)                              | 0.0289±0.4336       | <b>0.1357±0.5376</b> | 0.1074±0.422         | <b>0.1114±0.3123</b> |
| PCC                                | 0.018±0.3286        | -0.1799±0.6781       | <b>0.278±0.2993</b>  | 0.0687±0.2975        |

The medial prefrontal cortex (MPFC), left lateral parietal (LP(L)), right lateral parietal (LP(R)), and posterior cingulate cortex (PCC).

**Table S3.** Mean/ standard deviation (STD) of connection strengths in the cerebellar network. The rows of the table show source regions, and columns represent target regions. Connections with power > 0.05 Hertz (Hz) are shown in bold. The Mean/STD of connection strengths in the resting-state network are presented in Hz.

| Cerebellar network Late-onset AD |                      |                |
|----------------------------------|----------------------|----------------|
| Mean/STD                         | CA                   | CP             |
| CA                               | 0.5268±0.3538        | -0.1225±0.3036 |
| CP                               | <b>0.1576±0.3913</b> | 0.2551±0.2948  |
| Cerebellar network aMCI          |                      |                |
| Mean/STD                         | CA                   | CP             |
| CA                               | 0.1126±0.6022        | -0.1354±0.3889 |
| CP                               | -0.0354±0.8016       | 0.0028±0.4616  |
| Cerebellar network normal        |                      |                |
| Mean/STD                         | CA                   | CP             |

|    |                |               |
|----|----------------|---------------|
| CA | 0.1448±0.6776  | 0.0308±0.4729 |
| CP | -0.2734±0.7969 | 0.058±0.4355  |

Cerebellar Anterior (CA), Cerebellar Posterior (CP).

**Table S4.** Mean/ standard deviation (STD) of connection strengths in the dorsal attention network. The rows of the table show source regions, and columns represent target regions. Connections with power > 0.05 Hertz (Hz) are shown in bold. The Mean/STD of connection strengths in the resting-state network are presented in Hz.

| Dorsal attention network Late-onset AD |                      |                      |                      |                      |
|----------------------------------------|----------------------|----------------------|----------------------|----------------------|
| Mean/STD                               | FEF(L)               | FEF(R)               | IPS(L)               | IPS(R)               |
| FEF(L)                                 | -0.0519±0.5304       | <b>0.2034±0.5523</b> | <b>0.287±0.411</b>   | -0.1844±0.5695       |
| FEF(R)                                 | <b>0.1537±0.2694</b> | 0.0327±0.3593        | 0.0364±0.6034        | -0.0936±0.4363       |
| IPS(L)                                 | -0.1418±0.5812       | -0.2926±0.6407       | -0.0756±0.554        | -0.2425±0.7862       |
| IPS(R)                                 | -0.1984±0.6116       | 0.0457±0.5509        | 0.0264±0.2732        | -0.0185±0.4051       |
| Dorsal attention network aMCI          |                      |                      |                      |                      |
| Mean/STD                               | FEF(L)               | FEF(R)               | IPS(L)               | IPS(R)               |
| FEF(L)                                 | 0.0979±0.4236        | <b>0.0864±0.4087</b> | -0.2168±0.5523       | -0.0235±0.4393       |
| FEF(R)                                 | 0.0182±0.5701        | -0.1093±0.4494       | -0.372±0.5519        | -0.1774±0.5737       |
| IPS(L)                                 | -0.0171±0.3375       | <b>0.138±0.5039</b>  | -0.0658±0.5152       | <b>0.0961±0.2959</b> |
| IPS(R)                                 | -0.0324±0.4299       | <b>0.1551±0.4253</b> | <b>0.0762±0.5769</b> | 0.0954±0.4449        |
| Dorsal attention network normal        |                      |                      |                      |                      |
| Mean/STD                               | FEF(L)               | FEF(R)               | IPS(L)               | IPS(R)               |
| FEF(L)                                 | 0.0238±0.4555        | <b>0.1554±0.4249</b> | -0.0836±0.4543       | 0.0371±0.5227        |
| FEF(R)                                 | <b>0.1223±0.5017</b> | 0.034±0.3776         | -0.1564±0.5864       | <b>0.1095±0.4451</b> |
| IPS(L)                                 | 0.0048±0.36          | -0.0178±0.3541       | 0.0609±0.3527        | <b>0.1062±0.4176</b> |
| IPS(R)                                 | -0.3116±0.3849       | 0.0003±0.2841        | -0.0355±0.5638       | 0.1137±0.4163        |

Left frontal eye field (FEF(L)), right frontal eye field (FEF(R)), left intraparietal sulcus (IPS(L)), right intraparietal sulcus (IPS(R)).

**Table S5.** Mean/ standard deviation (STD) of connection strengths in the sensorimotor network. The rows of the table show source regions, and columns represent target regions. Connections with power > 0.05 Hertz (Hz) are shown in bold. The Mean/STD of connection strengths in the resting-state network is presented in Hz.

| Sensorimotor network Late-onset AD |                      |                      |                |
|------------------------------------|----------------------|----------------------|----------------|
| Mean/STD                           | SML(L)               | SML(R)               | SMS            |
| SML(L)                             | 0.0062±0.6041        | -0.2204±0.7098       | -0.1655±0.4555 |
| SML(R)                             | <b>0.1037±0.3392</b> | 0.2294±0.4347        | -0.2055±0.4804 |
| SMS                                | -0.2257±0.494        | -0.0743±0.5211       | -0.0737±0.4367 |
| Sensorimotor network aMCI          |                      |                      |                |
| Mean/STD                           | SML(L)               | SML(R)               | SMS            |
| SML(L)                             | 0.0432±0.4886        | <b>0.0994±0.4121</b> | -0.1453±0.3633 |
| SML(R)                             | 0.0078±0.621         | 0.1664±0.3402        | -0.4553±0.5763 |
| SMS                                | -0.0601±0.5495       | <b>0.0602±0.4092</b> | -0.1174±0.3768 |
| Sensorimotor network normal        |                      |                      |                |

| Mean/STD | SML(L)               | SML(R)              | SMS            |
|----------|----------------------|---------------------|----------------|
| SML(L)   | 0.1798±0.3148        | <b>0.083±0.3874</b> | -0.2487±0.5767 |
| SML(R)   | <b>0.2023±0.5704</b> | 0.1763±0.4755       | -0.1815±0.4629 |
| SMS      | -0.0538±0.5564       | -0.1753±0.7828      | -0.1277±0.3987 |

Right sensorimotor lateral (SML(R)), left sensorimotor lateral (SML(L)), sensorimotor superior (SMS).

**Table S6.** Mean/ standard deviation (STD) of connection strengths in the visual network. The rows of the table show source regions, and columns represent target regions. Connections with power > 0.05 Hertz (Hz) are shown in bold. The Mean/STD of connection strengths in the resting-state network is presented in Hz.

| Visual network Late-onset AD |                      |                |                      |                      |
|------------------------------|----------------------|----------------|----------------------|----------------------|
| Mean/STD                     | VM                   | VO             | VL(L)                | VL(R)                |
| VM                           | -0.0424±0.3695       | -0.0446±0.3921 | -0.3499±0.5886       | -0.0059±0.6237       |
| VO                           | <b>0.2141±0.4857</b> | -0.0694±0.38   | -0.0142±0.524        | -0.0347±0.5984       |
| VL(L)                        | <b>0.1123±0.189</b>  | -0.048±0.3396  | 0.2159±0.3503        | <b>0.1616±0.3396</b> |
| VL(R)                        | <b>0.1078±0.2355</b> | 0.0385±0.3839  | -0.0735±0.5119       | 0.1482±0.4724        |
| Visual network aMCI          |                      |                |                      |                      |
| Mean/STD                     | VM                   | VO             | VL(L)                | VL(R)                |
| VM                           | -0.0316±0.3711       | -0.1772±0.3558 | -0.1024±0.6743       | -0.1621±0.4861       |
| VO                           | <b>0.4176±0.386</b>  | -0.2015±0.4258 | -0.2809±0.5072       | 0.0259±0.4511        |
| VL(L)                        | 0.0186±0.3126        | 0.0323±0.4403  | 0.0516±0.3958        | <b>0.1064±0.3256</b> |
| VL(R)                        | <b>0.1545±0.204</b>  | -0.1764±0.347  | <b>0.1657±0.4102</b> | 0.3012±0.3156        |
| Visual network normal        |                      |                |                      |                      |
| Mean/STD                     | VM                   | VO             | VL(L)                | VL(R)                |
| VM                           | -0.1311±0.3386       | -0.0486±0.4331 | 0.0279±0.4028        | -0.3062±0.6314       |
| VO                           | <b>0.4184±0.404</b>  | -0.1143±0.3851 | <b>0.091±0.6097</b>  | -0.3243±0.5777       |
| VL(L)                        | <b>0.1847±0.3356</b> | -0.1349±0.3413 | 0.3786±0.3576        | -0.0093±0.3689       |
| VL(R)                        | <b>0.0966±0.3162</b> | -0.0522±0.4088 | <b>0.1251±0.2682</b> | 0.2283±0.4745        |

Right visual lateral (VL(R)), left visual lateral (VL(L)), visual medial (VM), visual occipital (VO).

**Table S7.** Mean/ standard deviation (STD) of connection strengths in the salience network. The rows of the table show source regions, and columns represent target regions. Connections with power > 0.05 Hertz (Hz) are shown in bold. The Mean/STD of connection strengths in the resting-state network is presented in Hz.

| Salience network Late-onset AD |              |                   |                   |              |                   |               |              |
|--------------------------------|--------------|-------------------|-------------------|--------------|-------------------|---------------|--------------|
| Mean/S<br>TD                   | ACC          | AInsula(L)        | AInsula(R<br>)    | RPFC(L)      | RPFC(R)           | SMG(L)        | SMG(R)       |
| ACC                            | -            | <b>0.0734±0.3</b> | -                 | -            | <b>0.1563±0.3</b> | 0.0338±0.3    | -            |
|                                | 0.0685±0.314 | <b>332</b>        | 0.1126±0.4785     | 0.053±0.2434 | <b>788</b>        | 909           | 0.191±0.3693 |
| AInsula(L)                     | -            | -                 | <b>0.1431±0.4</b> | 0.0025±0.3   | -                 | -             | -            |
|                                | 0.2551±0.311 | 0.1003±0.2954     | <b>105</b>        | 514          | 0.1262±0.3621     | 0.2758±0.2536 | 0.178±0.3188 |

| Alnsula(R)                     | -<br>0.2048±0.3<br>178          | 0.0493±0.4<br>832               | -<br>0.2169±0.3<br>835 | -<br>0.2599±0.4<br>567 | -<br>0.0179±0.4<br>487          | -<br>0.2567±0.3<br>925          | -<br>0.1413±0.3<br>711          |
|--------------------------------|---------------------------------|---------------------------------|------------------------|------------------------|---------------------------------|---------------------------------|---------------------------------|
| RPFC(L)                        | <b>0.0604±0.2</b><br><b>809</b> | 0.0036±0.3<br>916               | -<br>0.0552±0.2<br>359 | 0.1224±0.2<br>828      | <b>0.254±0.36</b><br><b>25</b>  | -<br>0.0201±0.2<br>71           | -<br>0.0471±0.2<br>209          |
| RPFC(R)                        | <b>0.1266±0.4</b><br><b>422</b> | -<br>0.1048±0.3<br>229          | -<br>0.0006±0.3<br>904 | -<br>0.0056±0.3<br>42  | -<br>0.0021±0.3<br>345          | -<br>0.1394±0.3<br>698          | -<br>0.0685±0.3<br>065          |
| SMG(L)                         | -<br>0.0832±0.5<br>319          | <b>0.1334±0.2</b><br><b>185</b> | -<br>0.2121±0.2<br>874 | -<br>0.1108±0.1<br>582 | -<br>0.1079±0.3<br>271          | -<br>0.0477±0.2<br>394          | <b>0.1198±0.3</b><br><b>465</b> |
| SMG(R)                         | <b>0.1019±0.3</b><br><b>924</b> | -<br>0.0541±0.3<br>032          | 0.049±0.21<br>41       | -<br>0.0629±0.2<br>37  | -<br>0.1004±0.3<br>067          | <b>0.1471±0.3</b><br><b>906</b> | 0.0765±0.3<br>364               |
| <b>Salience network aMCI</b>   |                                 |                                 |                        |                        |                                 |                                 |                                 |
| Mean/S<br>TD                   | ACC                             | Alnsula(L)                      | Alnsula(R<br>)         | RPFC(L)                | RPFC(R)                         | SMG(L)                          | SMG(R)                          |
| ACC                            | 0.0756±0.2<br>328               | 0.0402±0.3<br>674               | -<br>0.0424±0.3<br>365 | 0.0079±0.3<br>286      | 0.0104±0.4<br>143               | -<br>0.0459±0.2<br>523          | <b>0.0737±0.2</b><br><b>865</b> |
| Alnsula(L)                     | -<br>0.1768±0.2<br>821          | -<br>0.1455±0.4<br>154          | 0.0322±0.5<br>298      | -<br>0.0726±0.3<br>978 | -<br>0.0487±0.4<br>519          | -<br>0.3316±0.6<br>011          | -<br>0.1083±0.4<br>297          |
| Alnsula(R)                     | -<br>0.1238±0.4<br>495          | 0.0804±0.4<br>1                 | -<br>0.0279±0.3<br>851 | -<br>0.2344±0.5<br>008 | <b>0.065±0.29</b><br><b>94</b>  | -<br>0.0894±0.6<br>053          | -<br>0.0963±0.4<br>094          |
| RPFC(L)                        | <b>0.0967±0.3</b><br><b>008</b> | <b>0.1018±0.3</b><br><b>191</b> | -<br>0.156±0.26<br>31  | -<br>0.0502±0.3<br>451 | <b>0.3015±0.3</b><br><b>969</b> | -<br>0.0837±0.3<br>707          | 0.0188±0.2<br>798               |
| RPFC(R)                        | 0.0473±0.3<br>658               | 0.0158±0.3<br>13                | -<br>0.0073±0.3<br>187 | -<br>0.1013±0.3<br>716 | -<br>0.1358±0.3<br>231          | -<br>0.024±0.53<br>66           | 0.0156±0.3<br>421               |
| SMG(L)                         | -<br>0.0228±0.1<br>864          | -<br>0.0102±0.2<br>231          | 0.0315±0.3<br>879      | -<br>0.0972±0.2<br>842 | 0.0063±0.3<br>246               | -<br>0.1159±0.4<br>88           | 0.0278±0.4<br>431               |
| SMG(R)                         | 0.0019±0.2<br>925               | <b>0.0934±0.2</b><br><b>666</b> | -<br>0.044±0.27<br>39  | -<br>0.0789±0.3<br>724 | -<br>0.0823±0.2<br>394          | 0.032±0.29<br>58                | 0.0808±0.3<br>194               |
| <b>Salience network normal</b> |                                 |                                 |                        |                        |                                 |                                 |                                 |
| Mean/S<br>TD                   | ACC                             | Alnsula(L)                      | Alnsula(R<br>)         | RPFC(L)                | RPFC(R)                         | SMG(L)                          | SMG(R)                          |
| ACC                            | 0.0898±0.3<br>346               | -<br>0.0789±0.2<br>64           | -<br>0.0558±0.2<br>466 | -<br>0.0015±0.4<br>281 | -<br>0.0043±0.2<br>929          | -<br>0.0894±0.3<br>328          | 0.0299±0.3<br>538               |

|            |                        |                                 |                                 |                                 |                        |                        |                                 |
|------------|------------------------|---------------------------------|---------------------------------|---------------------------------|------------------------|------------------------|---------------------------------|
| AInsula(L) | -<br>0.0742±0.5<br>928 | -<br>0.1069±0.3<br>336          | <b>0.1857±0.4</b><br><b>851</b> | -<br>0.2104±0.3<br>58           | 0.0026±0.3<br>867      | -<br>0.11±0.398<br>1   | <b>0.1172±0.6</b><br><b>132</b> |
| AInsula(R) | -<br>0.1137±0.4<br>138 | <b>0.2811±0.3</b><br><b>675</b> | -<br>0.1316±0.3<br>279          | -<br>0.0593±0.3<br>459          | 0.0003±0.2<br>478      | -<br>0.0754±0.3<br>636 | -<br>0.0004±0.4<br>806          |
| RPFC(L)    | 0.0093±0.4<br>258      | -<br>0.0049±0.3<br>59           | -<br>0.1526±0.3<br>922          | 0.0711±0.2<br>513               | 0.0379±0.4<br>475      | -<br>0.1467±0.4<br>117 | -<br>0.166±0.34<br>41           |
| RPFC(R)    | -<br>0.043±0.34<br>04  | -<br>0.0778±0.2<br>644          | -<br>0.0394±0.4<br>763          | <b>0.0517±0.4</b><br><b>031</b> | 0.0326±0.4<br>074      | -<br>0.304±0.51<br>16  | -<br>0.0432±0.3<br>452          |
| SMG(L)     | 0.0475±0.2<br>129      | 0.025±0.25<br>84                | -<br>0.0115±0.1<br>812          | 0.0306±0.2<br>879               | -<br>0.0272±0.2<br>153 | 0.1568±0.3<br>673      | <b>0.237±0.20</b><br><b>56</b>  |
| SMG(R)     | 0.033±0.29<br>42       | -<br>0.0927±0.2<br>455          | -<br>0.0227±0.3<br>366          | 0.0381±0.4<br>073               | 0.02±0.330<br>2        | 0.0138±0.3<br>506      | 0.0764±0.3<br>547               |

Anterior cingulate cortex (ACC), left anterior insula (AInsula(L)), right anterior insula (AInsula(R)), left rostral prefrontal cortex (RPFC(L)), right rostral prefrontal cortex (RPFC(R)), left supramarginal gyrus (SMG(L)), right supramarginal gyrus (SMG(R)).

**Table S8.** Mean/ standard deviation (STD) of connection strengths in the language network. The rows of the table show source regions, and columns represent target regions. Connections with power > 0.05 Hertz (Hz) are shown in bold. The Mean/STD of connection strengths in the resting-state network is presented in Hz.

| Language network Late-onset AD |                      |                      |                      |                      |
|--------------------------------|----------------------|----------------------|----------------------|----------------------|
| Mean/STD                       | IFG(L)               | IFG(R)               | pSTG(L)              | pSTG(R)              |
| IFG(L)                         | 0.2277±0.2982        | <b>0.2153±0.4016</b> | -0.4911±0.3282       | -0.3382±0.3775       |
| IFG(R)                         | -0.0686±0.3032       | 0.1019±0.4515        | -0.6058±0.671        | -0.4233±0.3589       |
| pSTG(L)                        | <b>0.269±0.1682</b>  | <b>0.1327±0.3245</b> | -0.0395±0.4104       | <b>0.2552±0.3479</b> |
| pSTG(R)                        | <b>0.1718±0.3441</b> | <b>0.1447±0.2669</b> | <b>0.3382±0.4182</b> | -0.0672±0.4418       |
| Language network aMCI          |                      |                      |                      |                      |
| Mean/STD                       | IFG(L)               | IFG(R)               | pSTG(L)              | pSTG(R)              |
| IFG(L)                         | -0.076±0.2187        | 0.0397±0.6772        | -0.1321±0.4353       | -0.1396±0.5338       |
| IFG(R)                         | <b>0.0556±0.3933</b> | -0.2367±0.3432       | -0.2553±0.5652       | -0.1733±0.3716       |
| pSTG(L)                        | <b>0.1992±0.2714</b> | -0.1669±0.3677       | 0.0728±0.4527        | <b>0.0688±0.3189</b> |
| pSTG(R)                        | 0.025±0.2168         | -0.0056±0.48         | <b>0.093±0.4245</b>  | 0.0532±0.3556        |
| Language network normal        |                      |                      |                      |                      |
| Mean/STD                       | IFG(L)               | IFG(R)               | pSTG(L)              | pSTG(R)              |
| IFG(L)                         | -0.1363±0.3306       | <b>0.1102±0.5921</b> | -0.314±0.3783        | -0.159±0.6939        |
| IFG(R)                         | -0.064±0.4753        | 0.0773±0.3986        | -0.2375±0.3974       | -0.1185±0.3843       |
| pSTG(L)                        | <b>0.0689±0.2677</b> | 0.0296±0.3855        | 0.1153±0.3405        | <b>0.2704±0.4178</b> |
| pSTG(R)                        | <b>0.0895±0.3506</b> | -0.0159±0.4873       | <b>0.1547±0.4383</b> | -0.1758±0.417        |

Left inferior frontal gyrus (IFG(L)), right inferior frontal gyrus (IFG(R)), left posterior superior temporal gyrus (pSTG(L)), right posterior superior temporal gyrus (pSTG(R)).

**Table S9.** Mean/ standard deviation (STD) of connection strengths in the frontoparietal network. The rows of the table show source regions, and columns represent target regions. Connections with power > 0.05 Hertz (Hz) are shown in bold. The Mean/STD of connection strengths in the resting-state network is presented in Hz.

| Frontoparietal network Late-onset AD |                      |                      |                      |                      |
|--------------------------------------|----------------------|----------------------|----------------------|----------------------|
| Mean/STD                             | LPFC(L)              | PPC(L)               | LPFC(R)              | PPC(R)               |
| LPFC(L)                              | 0.1158±0.3742        | -0.1073±0.3525       | <b>0.1378±0.2791</b> | -0.0848±0.912        |
| PPC(L)                               | 0.0014±0.4017        | 0.1144±0.4278        | -0.0895±0.4719       | <b>0.3607±0.377</b>  |
| LPFC(R)                              | <b>0.1584±0.2611</b> | -0.0867±0.3348       | 0.1609±0.3069        | -0.2101±0.527        |
| PPC(R)                               | -0.1621±0.5642       | 0.0068±0.4752        | -0.135±0.4989        | -0.333±0.3608        |
| Frontoparietal network aMCI          |                      |                      |                      |                      |
| Mean/STD                             | LPFC(L)              | PPC(L)               | LPFC(R)              | PPC(R)               |
| LPFC(L)                              | -0.1075±0.3744       | 0.0424±0.6427        | <b>0.1861±0.562</b>  | -0.2704±0.4646       |
| PPC(L)                               | 0.0443±0.3177        | 0.0733±0.3901        | -0.123±0.3868        | <b>0.2857±0.2411</b> |
| LPFC(R)                              | 0.0132±0.4775        | -0.0519±0.5009       | -0.0091±0.3679       | -0.1926±0.5945       |
| PPC(R)                               | -0.0483±0.4472       | 0.0125±0.3401        | -0.0725±0.4186       | 0.0929±0.3935        |
| Frontoparietal network normal        |                      |                      |                      |                      |
| Mean/STD                             | LPFC(L)              | PPC(L)               | LPFC(R)              | PPC(R)               |
| LPFC(L)                              | 0.0965±0.3387        | -0.2764±0.4156       | <b>0.3774±0.2993</b> | -0.3053±0.6246       |
| PPC(L)                               | <b>0.1876±0.2355</b> | -0.1511±0.3726       | -0.0965±0.4852       | <b>0.3863±0.5358</b> |
| LPFC(R)                              | -0.0924±0.4521       | -0.323±0.5528        | -0.1087±0.5188       | -0.2327±0.3933       |
| PPC(R)                               | -0.07±0.4392         | <b>0.1658±0.2866</b> | -0.0065±0.7043       | -0.095±0.3862        |

Left lateral prefrontal cortex (LPFC(L)), left posterior parietal cortex (PPC(L)), right lateral prefrontal cortex (LPFC(R)), right posterior parietal cortex (PPC(R)).
